# Supplementary material for: Quantitative Trait Loci and Maternal Effects Affecting the Strong Grain Dormancy of Wild Barley (Hordeum vulgare ssp. spontaneum)
Source: Front Plant Sci. 2017 Oct 30;8:1840. doi: 10.3389/fpls.2017.01840 (PMC5674934; doi:10.3389/fpls.2017.01840)
Supplement: Supplementary file 4 [file Table_4.XLS]

## Sheet: Table S3
	Table S4| BOPA1 marker names in each chromosome.
	The original marker name is available in Close et al. (2009) BMC Genomics 10:582 (doi: 10.1186/1471-2164-10-582)
	Chromosome 1H		Chromosome 2H		Chromosome 3H		Chromosome 4H		Chromosome 5H		Chromosome 6H		Chromosome 7H
	Marker names		Marker names		Marker names		Marker names		Marker names		Marker names		Marker names
	This study	Original	This study	Original	This study	Original	This study	Original	This study	Original	This study	Original	This study	Original
	20	11_1377	7	11_0986	23	11_1023	1	11_0133	15	11_1495	16	11_0151	61	11_1213
	47	11_0473	13	11_0719	24	11_0263	25	11_0259	22	11_0077	72	11_0234	67	11_0227
	94	11_0921	81	11_1384	35	11_1003	31	11_1173	111	11_1475	89	11_1376	104	11_0596
	118	11_1305	99	11_0801	55	11_0613	40	11_0328	117	11_0389	182	11_0096	110	11_1446
	122	11_1127	100	11_1454	69	11_0138	62	11_0741	153	11_1069	208	11_0177	135	11_0787
	143	11_0425	128	11_1055	71	11_0820	77	11_1441	154	11_0300	215	11_0722	144	11_0547
	161	11_1295	131	11_0956	87	11_0519	79	11_1048	165	11_1459	217	11_1496	151	11_0278
	162	11_0387	133	11_1175	88	11_1341	82	11_1136	203	11_1102	257	11_0661	164	11_0768
	186	11_1079	141	11_1429	96	11_1533	107	11_0928	209	11_0770	262	11_0961	179	11_0178
	218	11_0575	148	11_0410	112	11_1062	108	11_0520	253	11_0685	272	11_0511	199	11_1280
	226	11_0672	172	11_0248	121	11_1163	156	11_1403	290	11_0638	294	11_0839	206	11_0469
	229	11_0923	188	11_0802	129	11_1294	171	11_1434	311	11_0809	322	11_1367	212	11_0398
	233	11_1094	189	11_0595	136	11_0593	211	11_0049	320	11_1064	330	11_0686	213	11_0048
	236	11_0733	207	11_0854	146	11_1401	231	11_0298	326	11_0781	340	11_0233	216	11_0852
	255	11_0805	223	11_0728	181	11_1044	254	11_0783	331	11_1000	349	11_0030	228	11_1417
	276	11_0555	227	11_1460	191	11_0243	283	11_0998	393	11_1210	355	11_1151	242	11_0339
	319	11_0626	246	11_1474	202	11_0013	297	11_0166	451	11_0345	358	11_1505	317	11_0218
	321	11_0312	248	11_1008	219	11_0018	304	11_0812	477	11_0140	370	11_0399	344	11_1190
	388	11_0481	279	11_1261	234	11_0977	307	11_0245	503	11_0829	399	11_1033	365	11_0501
	421	11_0474	280	11_1178	238	11_0118	338	11_0811	534	11_0253	414	11_0542	377	11_0103
	480	11_0776	289	11_0147	245	11_0884	345	11_0817	559	11_0655	419	11_0725	395	11_1100
	491	11_0608	291	11_1112	252	11_0816	347	11_0543	592	11_0704	431	11_0965	404	11_1010
	501	11_0937	292	11_0379	267	11_1357	367	11_1093	626	11_0870	466	11_0967	412	11_0196
	513	11_1235	302	11_1320	278	11_1518	384	11_0020	628	11_0003	492	11_0702	422	11_0055
	515	11_0236	308	11_0947	309	11_1526	394	11_0800	639	11_0621	507	11_0509	426	11_0068
	547	11_0491	316	11_0756	329	11_0615	427	11_0739	667	11_0057	542	11_1249	473	11_0036
	612	11_0788	327	11_1511	334	11_1445	430	11_0446	670	11_1310	585	11_0282	489	11_1411
	624	11_1036	336	11_1130	359	11_1197	452	11_0069	683	11_1146	588	11_0968	518	11_0016
	650	11_1369	353	11_0368	368	11_0037	465	11_0395	685	11_0682	646	11_0464	522	11_1399
	658	11_0329	366	11_1386	374	11_1471	500	11_0924	701	11_0148	697	11_0674	576	11_0334
	661	11_0978	409	11_1108	376	11_1421	508	11_0396	703	11_0266	698	11_0005	663	11_0914
	728	11_1095	418	11_0678	385	11_0394	545	11_0332	725	11_0987	704	11_0994	689	11_0737
	752	11_1243	435	11_0933	389	11_0920	546	11_0705	726	11_0371	705	11_0242	718	11_1392
	767	11_0517	440	11_0466	436	11_0896	550	11_0536	735	11_1264	838	11_0732	781	11_0584
	770	11_0023	450	11_1270	498	11_0079	558	11_0709	736	11_0622	844	11_0249	793	11_0397
	859	11_0883	455	11_0643	506	11_1240	572	11_0697	746	11_0889	878	11_1497	803	11_0537
	896	11_0754	461	11_1317	517	11_0187	577	11_0269	756	11_0441	886	11_0523	818	11_0292
	901	11_0071	478	11_1350	535	11_0315	581	11_0052	758	11_0200	923	11_1431	839	11_0214
	953	11_1259	479	11_0658	536	11_0009	584	11_0990	788	11_0712	986	11_1512	863	11_0323
	968	11_0485	524	11_1398	563	11_0762	606	11_1362	789	11_1465	988	11_0701	946	11_0173
	997	11_0370	562	11_1148	573	11_0570	618	11_0892	801	11_0625	994	11_1383	958	11_1365
	1046	11_0591	565	11_1521	586	11_1171	680	11_1483	814	11_0210	1014	11_0723	973	11_0468
	1049	11_0648	578	11_1289	594	11_0749	695	11_0305	820	11_1077	1018	11_1207	1008	11_0161
	1068	11_0908	605	11_0505	599	11_1415	711	11_0740	824	11_1302	1039	11_0028	1016	11_0168
	1077	11_0935	620	11_0235	602	11_0436	727	11_0015	826	11_1083	1047	11_1312	1030	11_1110
	1081	11_0877	651	11_1371	622	11_0424	760	11_0179	843	11_0582	1053	11_1191	1056	11_1034
	1083	11_1251	652	11_0765	633	11_1440	783	11_1517	911	11_1185	1079	11_0465	1065	11_0583
	1095	11_0056	654	11_1030	635	11_0217	792	11_1375	919	11_0150	1126	11_0588	1086	11_1303
	1109	11_1457	665	11_0026	636	11_1494	796	11_1525	947	11_1040	1133	11_0832	1089	11_0360
	1116	11_0307	666	11_0650	648	11_1073	805	11_0743	955	11_0073	1176	11_1335	1108	11_1390
	1127	11_0599	679	11_0486	649	11_1519	806	11_0544	967	11_0960	1189	11_1427	1123	11_0337
	1151	11_0274	682	11_1342	672	11_0408	810	11_1041	978	11_1339	1210	11_0751	1183	11_0871
	1157	11_0564	693	11_0755	681	11_0780	829	11_0074	982	11_0953	1212	11_0922	1220	11_0734
	1185	11_0004	696	11_0353	684	11_1355	868	11_1316	1010	11_0391	1219	11_0275	1292	11_0619
	1211	11_1202	709	11_1065	687	11_0158	880	11_0372	1040	11_1406	1241	11_0197	1296	11_1405
	1237	11_0338	730	11_1482	694	11_0070	897	11_0660	1070	11_1516	1266	11_0676	1326	11_1145
	1269	11_0554	757	11_0489	722	11_0985	944	11_1397	1074	11_0515	1279	11_0645	1330	11_0102
	1276	11_0746	763	11_1347	740	11_0603	979	11_0470	1087	11_0680	1301	11_1107	1356	11_1298
	1300	11_0330	764	11_0694	762	11_0546	983	11_1128	1098	11_0019	1311	11_0623	1386	11_0080
	1306	11_0527	765	11_1535	772	11_1258	987	11_0471	1113	11_1121	1312	11_0850	1432	11_0091
	1372	11_0964	768	11_0895	786	11_0504	1004	11_0996	1117	11_1455	1320	11_0863	1440	11_0141
	1409	11_0358	790	11_0703	797	11_0532	1017	11_0873	1120	11_1287	1327	11_0169	1472	11_1209
	1423	11_0487	791	11_0121	799	11_1480	1021	11_0995	1129	11_1133	1343	11_0838	1490	11_0085
	1496	11_1046	800	11_1464	831	11_1470	1031	11_1007	1147	11_1336	1363	11_0256	1500	11_0750
	1501	11_0113	809	11_1088	855	11_0025	1044	11_0620	1149	11_0472	1399	11_0524	1528	11_1402
	1513	11_0143	811	11_1430	872	11_0145	1054	11_1111	1153	11_0206	1416	11_0172	1529	11_0086
	1525	11_1117	816	11_0499	876	11_0063	1059	11_0915	1168	11_0223	1439	11_1124
			848	11_0402	885	11_0944	1061	11_0569	1195	11_0160	1476	11_0936	Total 66 markers in 7H
	Total 67 markers in 1H		858	11_0456	888	11_0132	1088	11_0238	1201	11_0782	1486	11_0828
			882	11_0064	890	11_1432	1090	11_0666	1202	11_1462	1499	11_0357
			884	11_0252	903	11_1090	1094	11_1363	1222	11_1212	1510	11_0560
			938	11_0654	909	11_0229	1160	11_0092	1240	11_0081	1516	11_1509
			950	11_1436	914	11_1282	1178	11_1262	1281	11_1242
			960	11_0376	918	11_1091	1198	11_0576	1295	11_1382	Total 72 markers in 6H
			975	11_1332	922	11_0885	1231	11_0790	1309	11_0929
			980	11_0188	926	11_0628	1234	11_1216	1317	11_0586
			1024	11_0553	931	11_0663	1262	11_0792	1341	11_1139
			1051	11_0388	934	11_0795	1275	11_1381	1355	11_0318
			1096	11_1276	935	11_0774	1325	11_1352	1377	11_1058
			1100	11_1076	948	11_0289	1336	11_1330	1395	11_1319
			1101	11_1195	1015	11_0411	1350	11_1177	1406	11_1306
			1115	11_1237	1019	11_1228	1375	11_0881	1411	11_0159
			1121	11_0154	1062	11_0308	1408	11_0171	1414	11_1217
			1122	11_0452	1106	11_0876	1430	11_0065	1421	11_1056
			1163	11_1318	1111	11_0848	1447	11_0457	1424	11_1423
			1217	11_1315	1141	11_0365	1456	11_1385	1433	11_1389
			1221	11_0882	1161	11_1299	1474	11_1267	1448	11_0708
			1223	11_0793	1165	11_1296	1478	11_0951	1455	11_0612
			1229	11_1045	1225	11_0691	1488	11_0097	1463	11_0167
			1235	11_0153	1243	11_1500	1522	11_0840	1470	11_0842
			1238	11_0106	1247	11_1346	1526	11_0021	1489	11_0946
			1239	11_0299	1257	11_0857			1497	11_0117
			1249	11_0777	1271	11_1356	Total 91 markers in 4H		1509	11_0434
			1253	11_1253	1285	11_1408			1515	11_0211
			1290	11_0320	1297	11_0557			1531	11_0104
			1314	11_0105	1328	11_0384
			1345	11_1187	1353	11_1520			Total 95 markers in 5H
			1349	11_0849	1385	11_0262
			1354	11_0247	1388	11_0493
			1376	11_1360	1402	11_0673
			1391	11_0552	1404	11_0495
			1396	11_0598	1434	11_0779
			1405	11_0634	1444	11_1469
			1420	11_0224	1446	11_1047
			1451	11_0139	1452	11_1364
			1473	11_1486	1453	11_0488
			1480	11_0051	1461	11_1050
			1485	11_0860	1468	11_1013
			1498	11_1281	1504	11_0606
			1502	11_0845	1511	11_0461
			1505	11_1283
			1514	11_0467	Total 110 markers in 3H
			1534	11_1119
			Total 113 markers in 2H
